# Supplementary material for: Symmetrical and Unsymmetrical Dicopper Complexes Based on Bis-Oxazoline Units: Synthesis, Spectroscopic Properties and Reactivity
Source: MDPI journal article supplement (doi:10.3390/inorganics11080332), 2023-08-11
Supplement: s1 [file s1]

# Symmetrical and unsymmetrical dicopper complexes, based on bis-oxazoline units: synthesis, spectroscopic properties and reactivity

James A. Isaac, Gisèle Gellon, Florian Molton, Christian Philouze, Nicolas Le Poul, Catherine Belle\* and Aurore Thibon-Pourret\*

## Table of Contents

|                                                                                                                |    |
|----------------------------------------------------------------------------------------------------------------|----|
| 1-Ligand characterizations .....                                                                               | 2  |
| 1-1. $^1\text{H}$ and $^{13}\text{C}$ NMR spectra .....                                                        | 2  |
| 1-2. ESI-MS spectra.....                                                                                       | 4  |
| 2-Dicopper(I) complexes characterizations.....                                                                 | 5  |
| 2-1. $^1\text{H}$ NMR.....                                                                                     | 5  |
| 3. Reactivity of $\text{Cu}^{\text{I}}_2$ complexes.....                                                       | 6  |
| 3-1. Reactivity with $\text{O}_2$ .....                                                                        | 6  |
| 3-2: Reactivity of the $\text{Cu}_2\text{:O}_2$ species with external substrates. ....                         | 6  |
| 4- Characterizations of dicopper(II) complexes and mono-oxidized species.....                                  | 7  |
| 4-1. X-Ray diffraction.....                                                                                    | 7  |
| Table S1. Selected bond distances [ $\text{\AA}$ ] in <b>1</b> , <b>2A</b> and <b>2B</b> from X-ray data. .... | 8  |
| Table S2. Selected bond angles [ $^\circ$ ] in <b>1</b> , <b>2A</b> and <b>2B</b> from X-ray data. ....        | 8  |
| 4-2. ESI-MS for complexes <b>1</b> and <b>2</b> .....                                                          | 9  |
| 4-3. Electrochemical studies.....                                                                              | 9  |
| 4-4. EPR spectroscopy .....                                                                                    | 10 |
| 4-5. UV-Vis-NIR spectroelectrochemistry.....                                                                   | 11 |
| 4-6. Analysis of the NIR band for complex <b>2</b> .....                                                       | 13 |
| 5-Reactivity Studies of $\text{Cu}^{\text{II}}_2$ complexes .....                                              | 14 |
| 5-1.ESI-MS after electrolysis and demetallation .....                                                          | 14 |
| 5-2.Proposed mechanisms .....                                                                                  | 15 |

# 1-Ligand characterizations

1-<sup>1</sup>H and <sup>13</sup>C NMR spectra

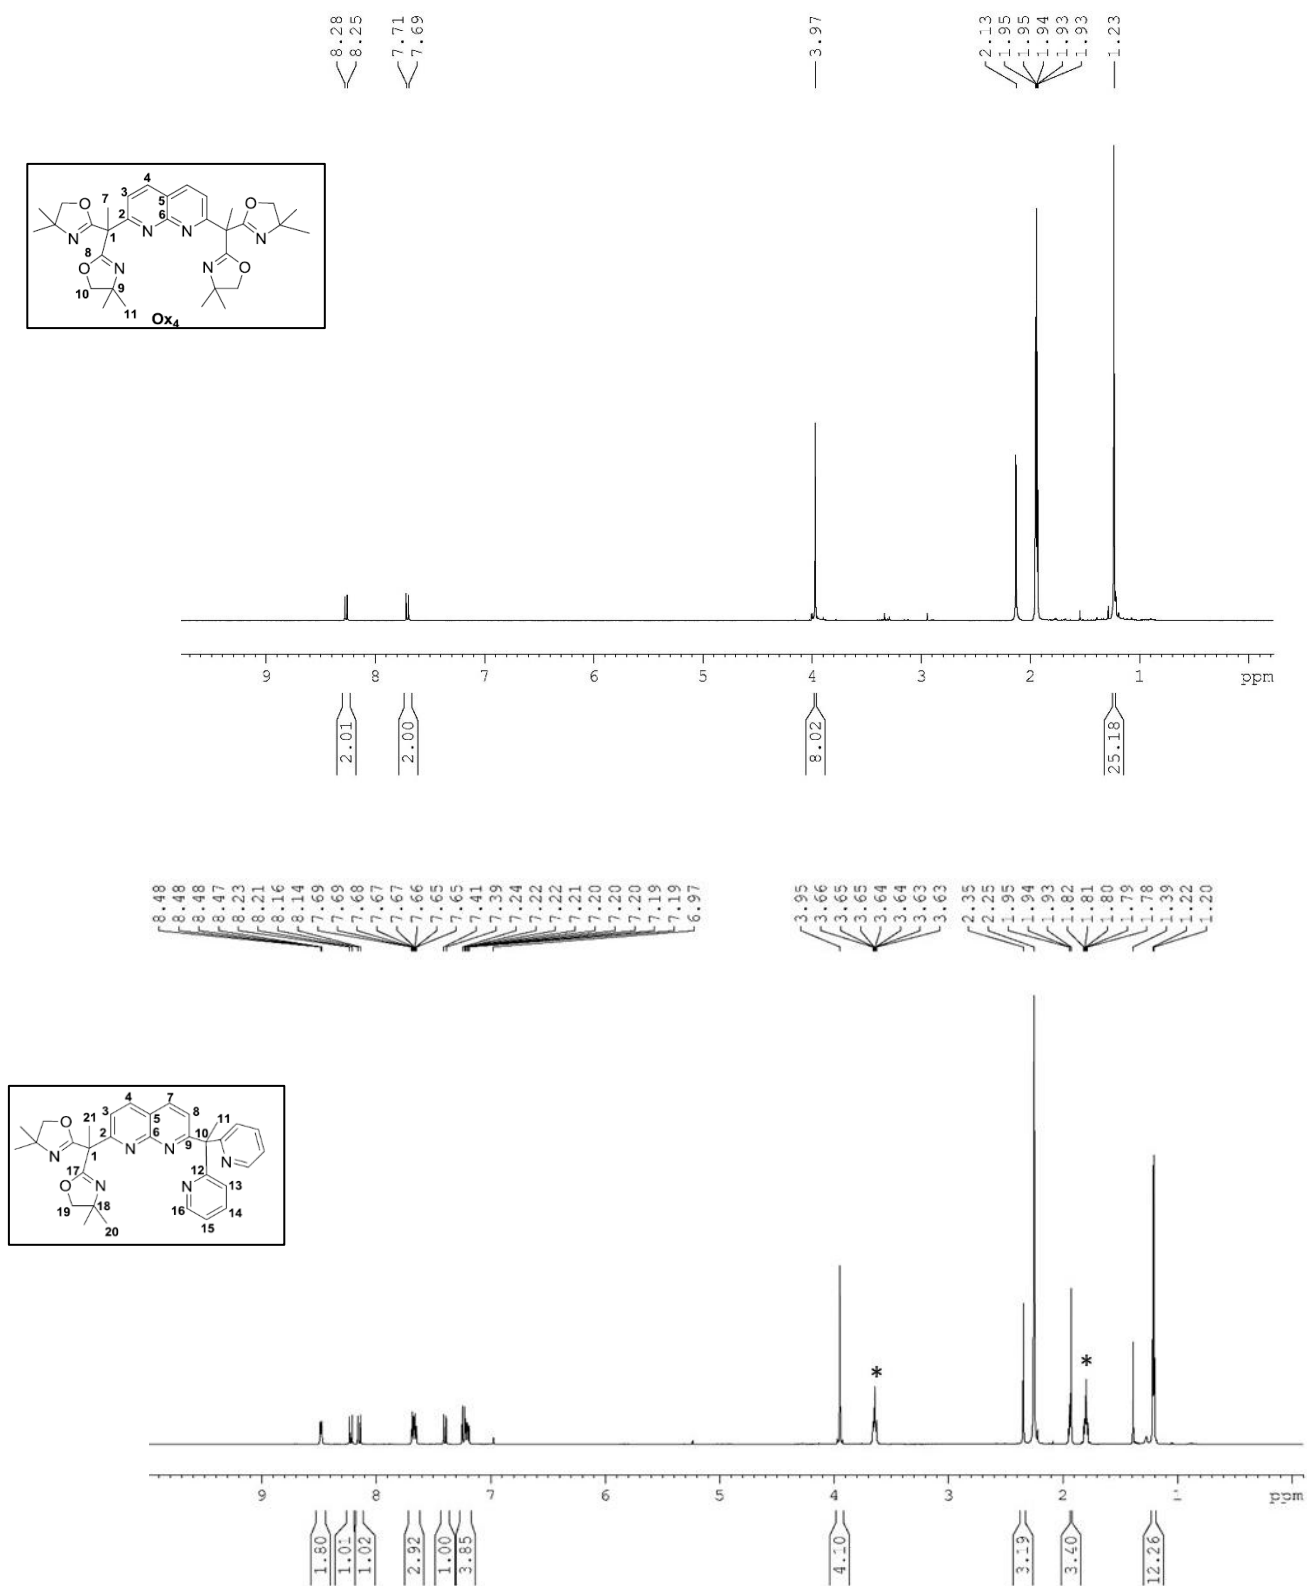

**Figure S1:** <sup>1</sup>H NMR spectra of ligand Ox<sub>4</sub> (top) and Ox<sub>2</sub>Py<sub>2</sub> (bottom) in CD<sub>3</sub>CN, starred peaks: THF

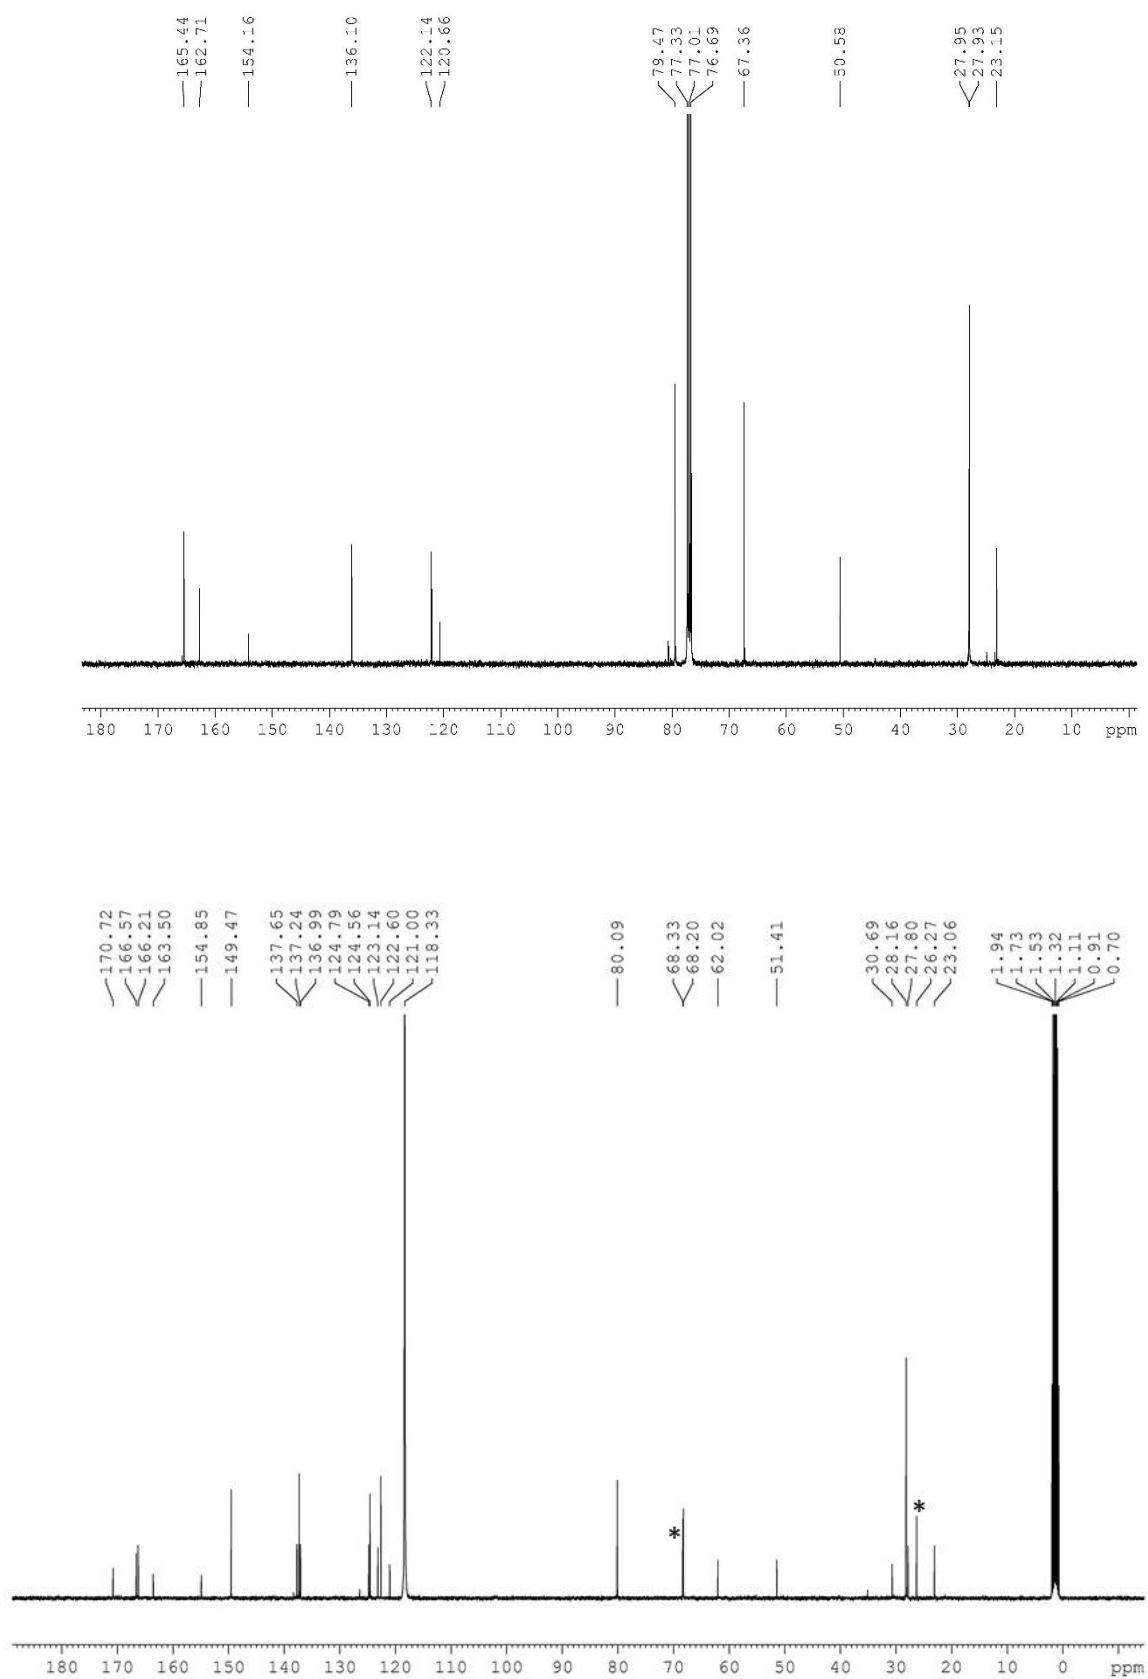

**Figure S2:** <sup>13</sup>C NMR spectra of ligand Ox<sub>4</sub> (top) in CDCl<sub>3</sub> and B: Ox<sub>2</sub>Py<sub>2</sub> (bottom) in CD<sub>3</sub>CN, starred peaks: THF

## 1-2. ESI-MS spectra

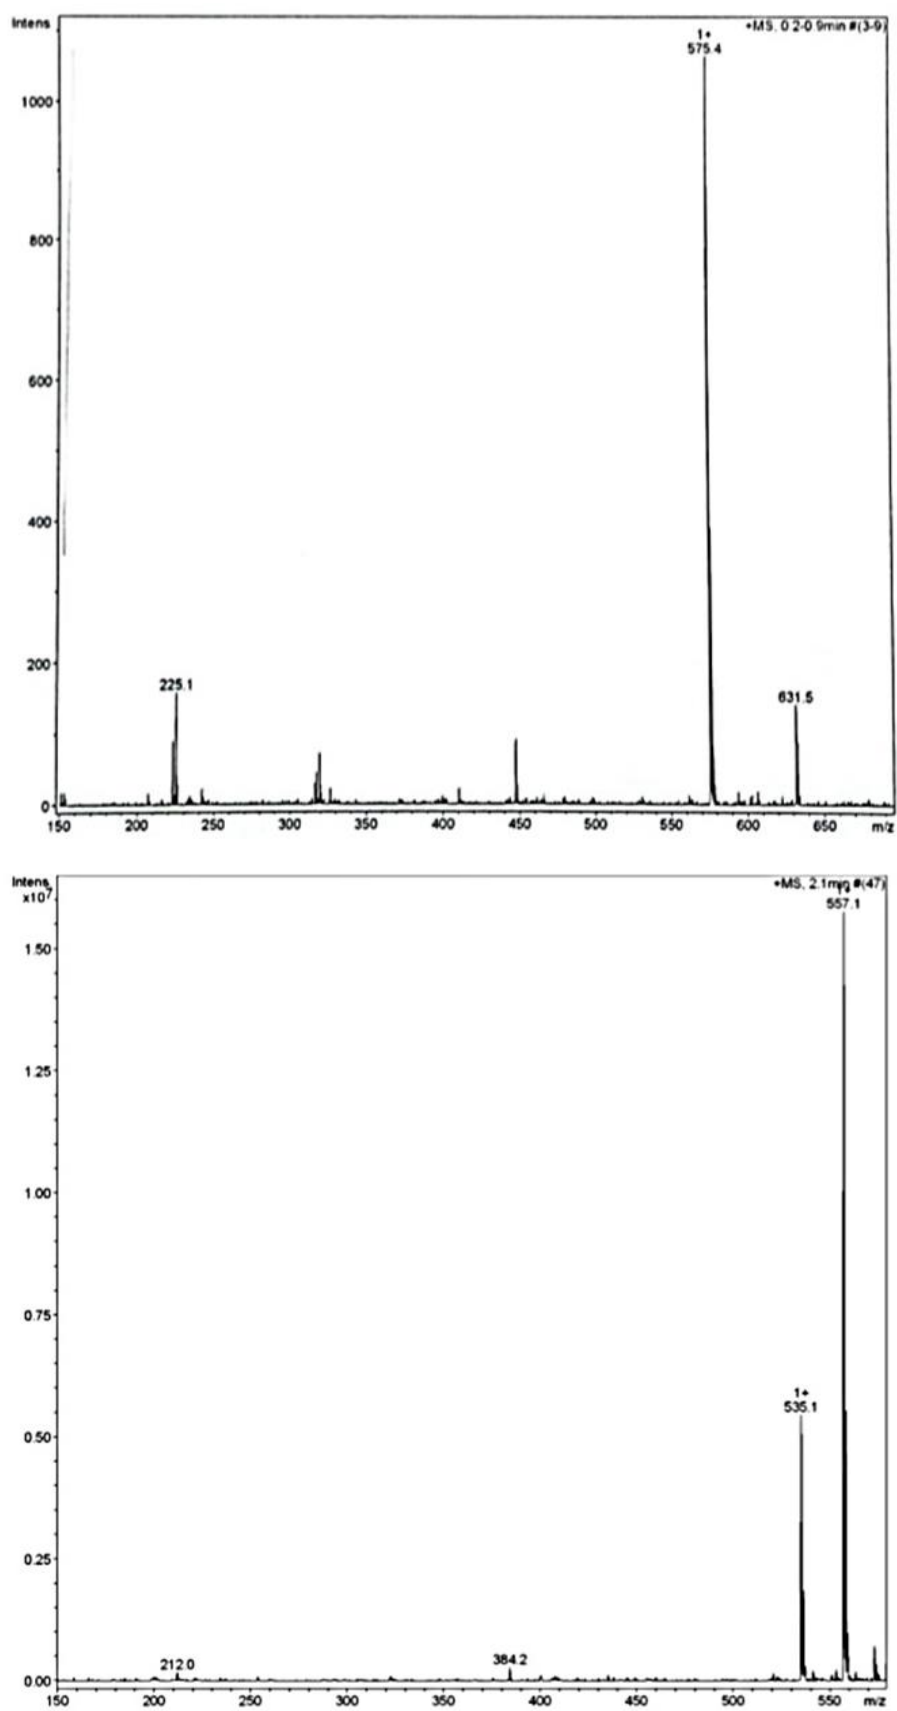

**Figure S3:** ESI-MS spectra of ligand Ox<sub>4</sub> (top) in CH<sub>2</sub>Cl<sub>2</sub> and B: Ox<sub>2</sub>Py<sub>2</sub> (bottom) in MeOH, C = 5.10<sup>-5</sup> M

## 2-Dicopper(I) complexes characterizations

2-1.<sup>1</sup>H NMR

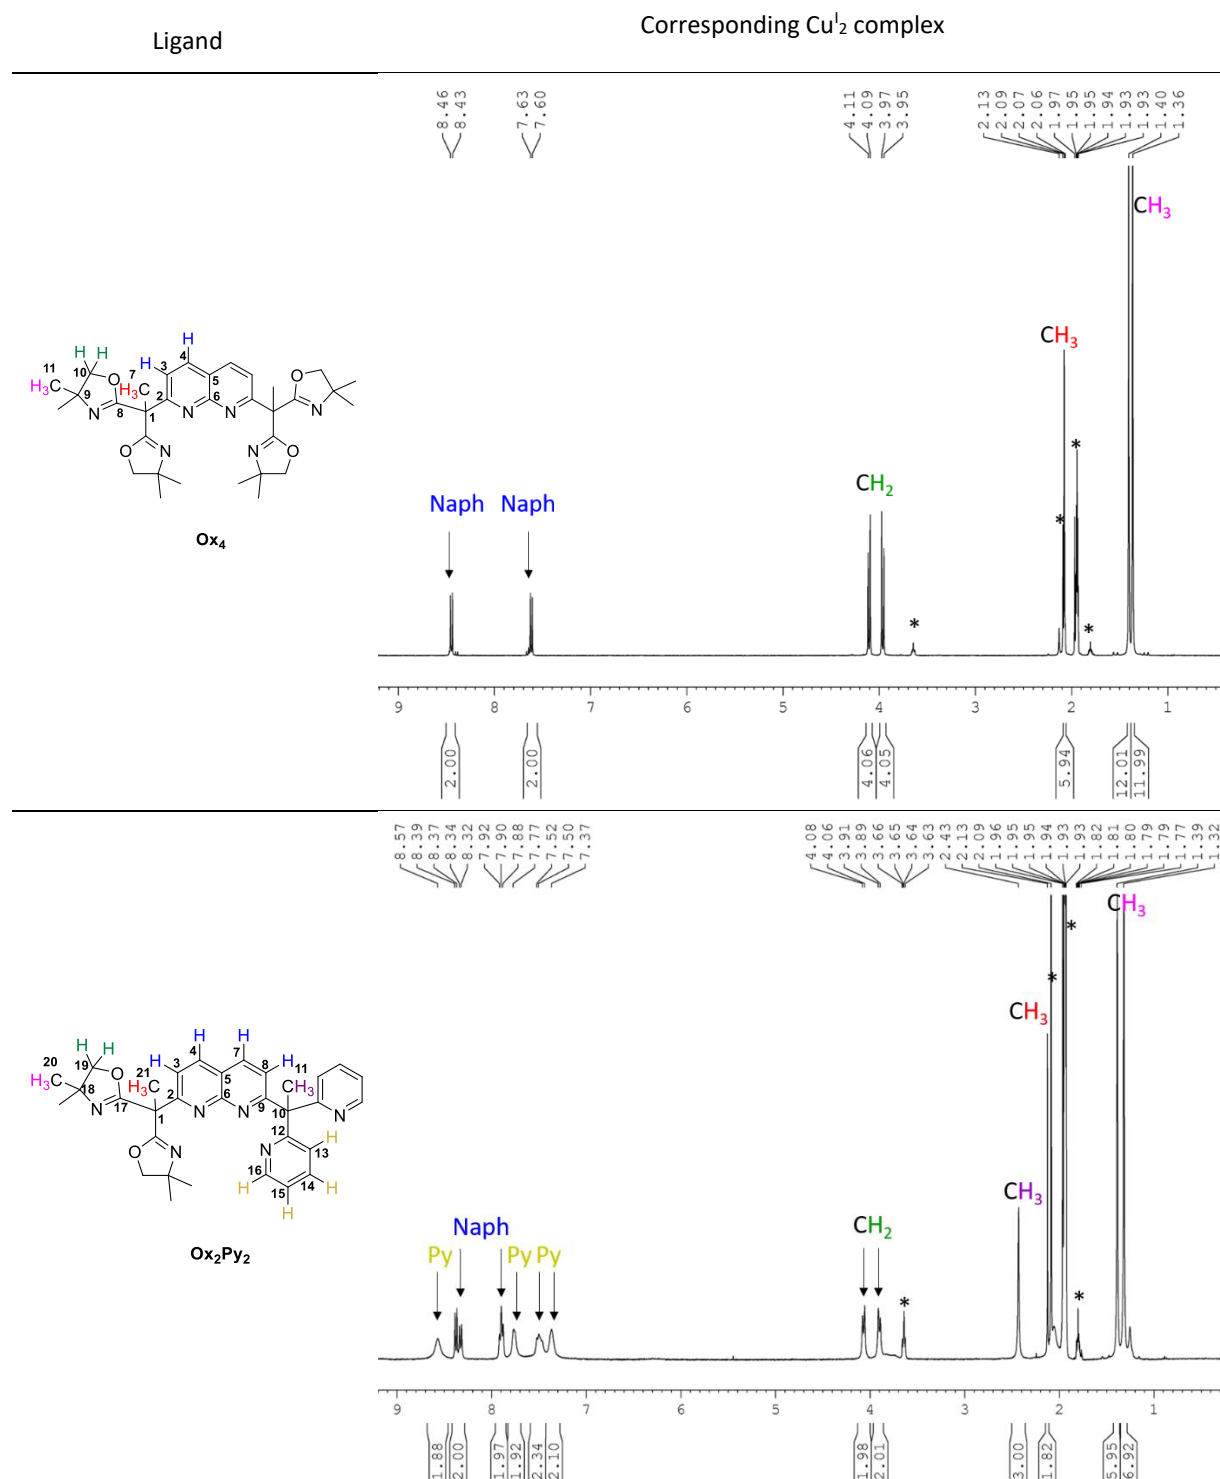

**Figure S4:** <sup>1</sup>H-NMR spectra of Cu<sub>2</sub>Ox<sub>4</sub> (top) and Cu<sub>2</sub>Ox<sub>2</sub>Py<sub>2</sub> (bottom) in CD<sub>3</sub>CN, with representations of the relevant ligands (left). Starred peaks from left to right: THF, water, acetonitrile and THF.

### 3. Reactivity of Cu<sup>I</sup><sub>2</sub> complexes

#### 3-1. Reactivity with O<sub>2</sub>

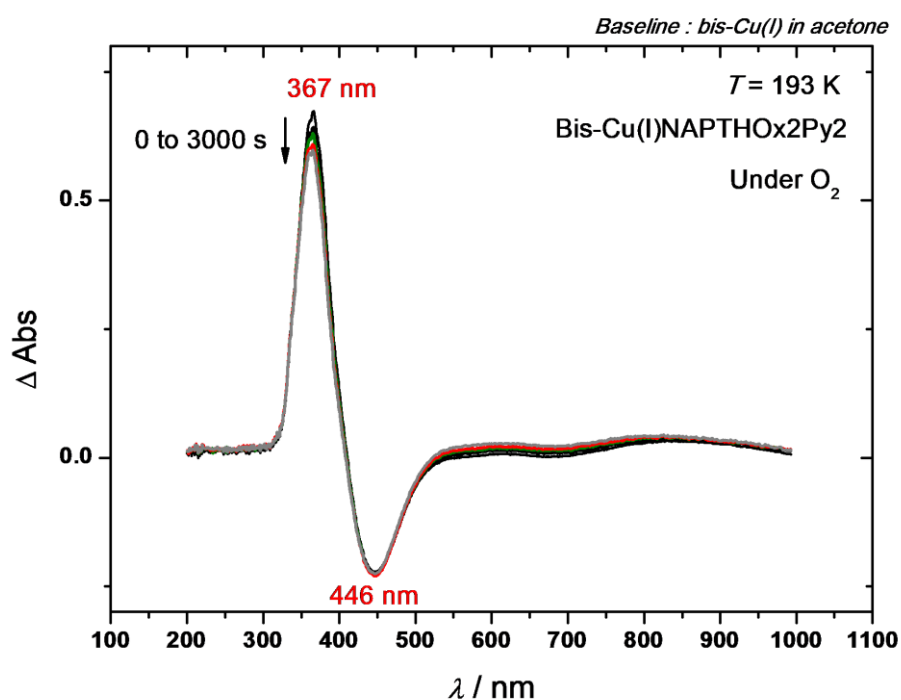

**Figure S5:** UV-vis spectrum after addition of O<sub>2</sub> to the complex Cu<sup>I</sup><sub>2</sub>Ox<sub>2</sub>Py<sub>2</sub>. Parameters: optical path = 1 cm; solvent acetone; concentration 0.33 mM,  $T = 193$  K. The baseline was taken on the Cu<sup>I</sup><sub>2</sub>Ox<sub>2</sub>Py<sub>2</sub> complex in acetone, explaining the use of  $\Delta$  Abs. instead of Abs. The absorption band at  $\lambda = 367$  nm is characteristic of the peroxide, thus allowing full the monitoring of its stability at 193 K. The negative value of  $\Delta$  Abs. at  $\lambda = 446$  nm corresponds to the disappearance of the MLCT band for the bis-Cu(I) species upon addition of O<sub>2</sub>. It remains constant over the experiment duration, showing no back transformation of the peroxide into the bis-Cu(I) species.

#### 3-2: Reactivity of the Cu<sub>2</sub>:O<sub>2</sub> species with external substrates.

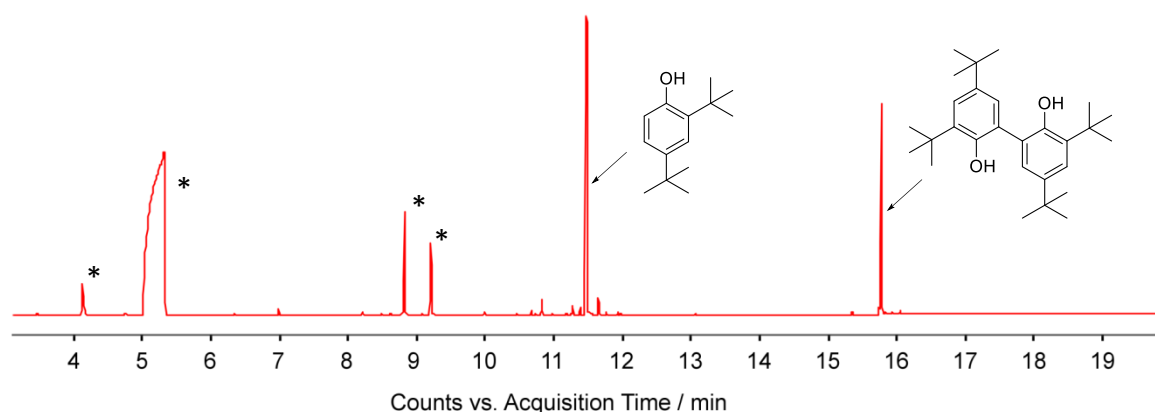

**Figure S6:** GCMS of the resulting solution after reaction of the  $\mu$ - $\eta^2$ : $\eta^2$ -peroxido-Cu<sup>I</sup><sub>2</sub> species from complex Cu<sup>I</sup><sub>2</sub>Ox<sub>4</sub> with 2,4-di-*tert*-butylphenol at  $193\text{ K} < T < 203\text{ K}$ . Starred peaks are present in the acetone (the solvent used). Results from the complex Cu<sup>I</sup><sub>2</sub>Ox<sub>2</sub>Py<sub>2</sub> are very similar.

## 4- Characterizations of dicopper(II) complexes and mono-oxidized species

### 4-1. X-Ray diffraction

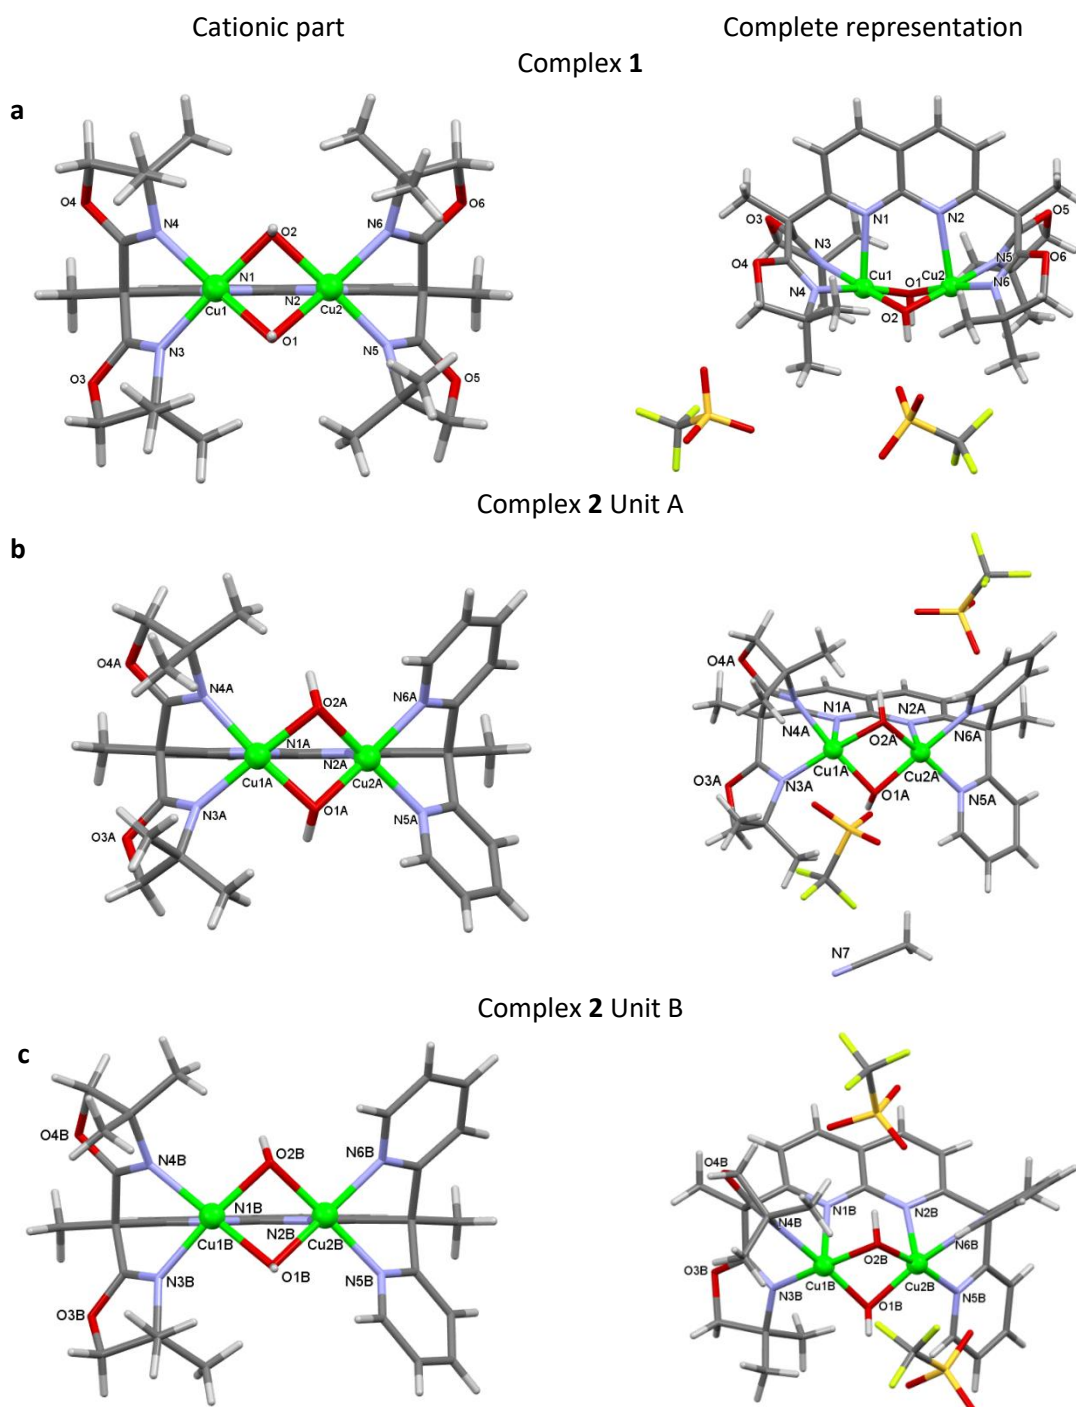

**Figure S7:** *Left:* View along the plane of the naphthyridine group for cationic part of a) **1**, b) **2A** and c) **2B**  
*Right:* complete representation with the triflate counteranions and solvent of a) **1**, b) **2A** and c) **2B**

**Table S1.** Selected bond distances [Å] in **1**, **2A** and **2B** from X-ray data.

| <b>1</b>            | <b>2A</b>            | <b>2B</b>            |
|---------------------|----------------------|----------------------|
| Cu1...Cu2 2.7537(5) | Cu1A...Cu2A 2.795(1) | Cu1B...Cu2B 2.774(1) |
| Cu1–O1 1.934(2)     | Cu1A–O1A 1.932(4)    | Cu1B–O1B 1.949 (5)   |
| Cu1–O2 1.941(2)     | Cu1A–O2A 1.938(4)    | Cu1B–O2B 1.924(4)    |
| Cu1–N3 2.016(2)     | Cu1A–N3A 1.977(5)    | Cu1B–N3B 2.004(5)    |
| Cu1–N4 2.010(2)     | Cu1A–N4A 2.010(5)    | Cu1B–N4B 1.978 (6)   |
| Cu1–N1 2.427(2)     | Cu1A–N1A 2.470(5)    | Cu1B–N1B 2.482(5)    |
| Cu2–O1 1.940(2)     | Cu2A–O1A 1.929(4)    | Cu2B–O1B 1.949(5)    |
| Cu2–O2 1.946(2)     | Cu2A–O2A 1.940(4)    | Cu2B–O2B 1.927(5)    |
| Cu2–N5 1.997(2)     | Cu2A–N5A 1.991(5)    | Cu2B–N5B 2.000 (7)   |
| Cu2–N6 2.011(2)     | Cu2A–N6A 1.996(5)    | Cu2B–N6B 1.981(5)    |
| Cu2–N2 2.460(2)     | Cu2A–N2A 2.259(5)    | Cu2B–N2B 2.288(5)    |

**Table S2.** Selected bond angles [°] in **1**, **2A** and **2B** from X-ray data.

| <b>1</b>            | <b>2A</b>               | <b>2B</b>               |
|---------------------|-------------------------|-------------------------|
| O1–Cu2–O2 82.13(7)  | O1A–Cu2A–O2A 80.47(18)  | O1B–Cu2B–O2B 81.5(2)    |
| O1–Cu1–N4 94.33(7)  | O1A–Cu1A–N4A 174.1(2)   | O1B–Cu1B–N4B 174.8(2)   |
| O1–Cu2–N6 173.82(7) | O1A–Cu2A–N6A 169.0(2)   | O1B–Cu2B–N6B 166.9(2)   |
| O1–Cu1–O2 82.41(6)  | O1A–Cu1A–O2A 80.45(18)  | O1B–Cu1B–O2B 81.7(2)    |
| O2–Cu1–N4 94.33(7)  | O2A–Cu1A–N4A 94.8(2)    | O2B–Cu1B–N4B 98.0(2)    |
| O2–Cu2–N6 94.97(7)  | O2A–Cu2A–N6A 93.7(2)    | O2B–Cu2B–N6B 95.2(2)    |
| O2–Cu2–N2 96.80(6)  | O2A–Cu2A–N2A 105.18(19) | O2B–Cu2B–N2B 101.92(19) |
| N3–Cu1–N4 88.43(7)  | N3A–Cu1A–N4A 87.3(2)    | N3B–Cu1B–N4B 87.7(2)    |
| N5–Cu2–N6 87.10(8)  | N5A–Cu2A–N6A 87.6(2)    | N5B–Cu2B–N6B 88.2(2)    |
| O2–Cu1–N4 94.33(7)  | O2A–Cu1A–N4A 94.8(2)    | O2B–Cu1B–N4B 94.0(2)    |
| O1–Cu2–N5 95.81(7)  | O1A–Cu2A–N5A 96.1(2)    | O1B–Cu2B–N5B 93.7(2)    |
| Cu1–O1–Cu2 90.39(6) | Cu1A–O1A–Cu2A 92.75(18) | Cu1B–O1B–Cu2B 92.75(18) |
| Cu1–O2–Cu2 90.39(6) | Cu1A–O2A–Cu2A 92.24(18) | Cu1B–O2B–Cu2B 92.24(18) |



#### 4-2. ESI-MS for complexes **1** and **2**

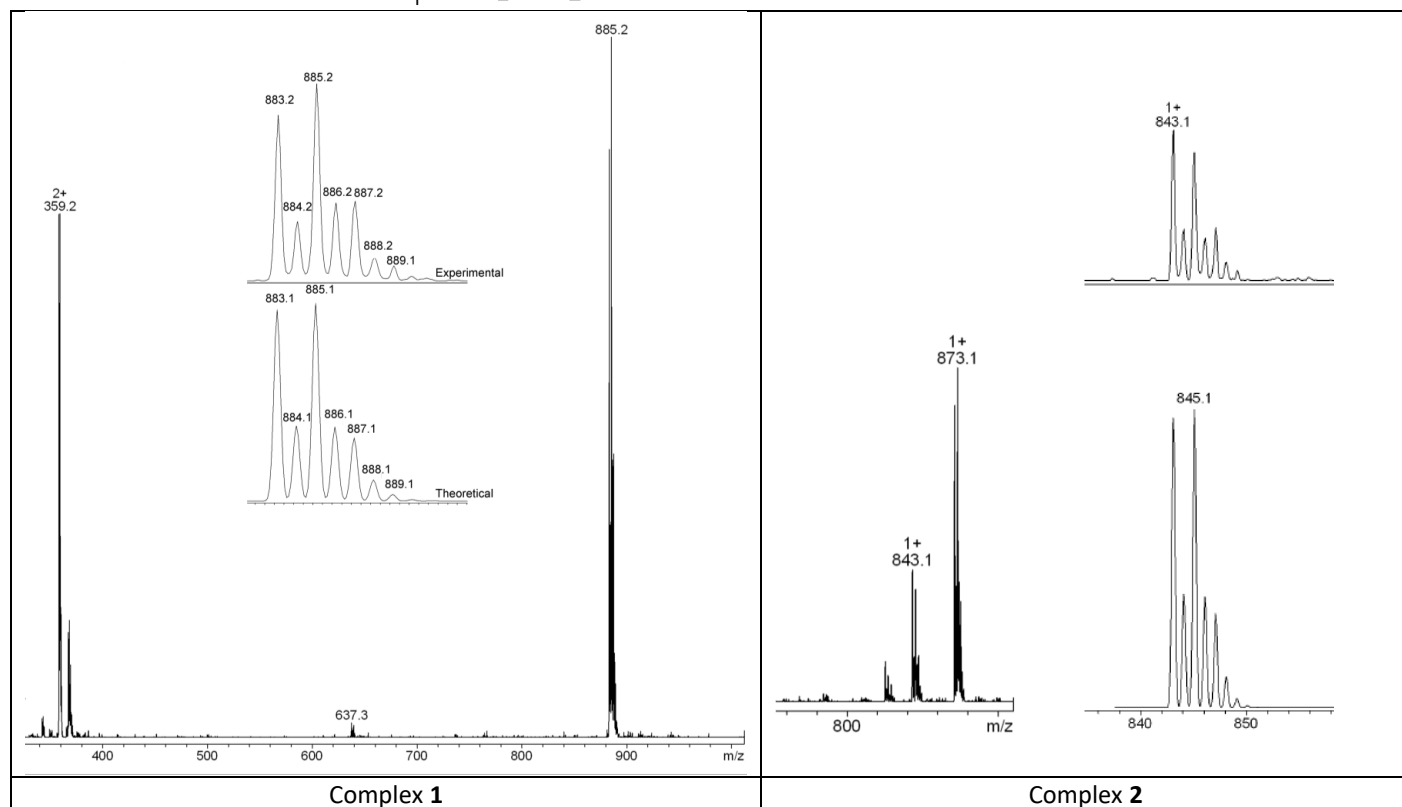

**Figure S8:** ESI-MS spectra of complexes  $\text{Cu}^{\text{II}}_2\text{Ox}_4$  (**1**)(left) and  $\text{Cu}^{\text{II}}_2\text{Ox}_2\text{Py}_2$  (**2**)(right); recorded in acetonitrile. Inset: theoretical and experimental isotopic profiles of the peaks at  $m/z = 883$  and  $843$

#### 4-3. Electrochemical studies

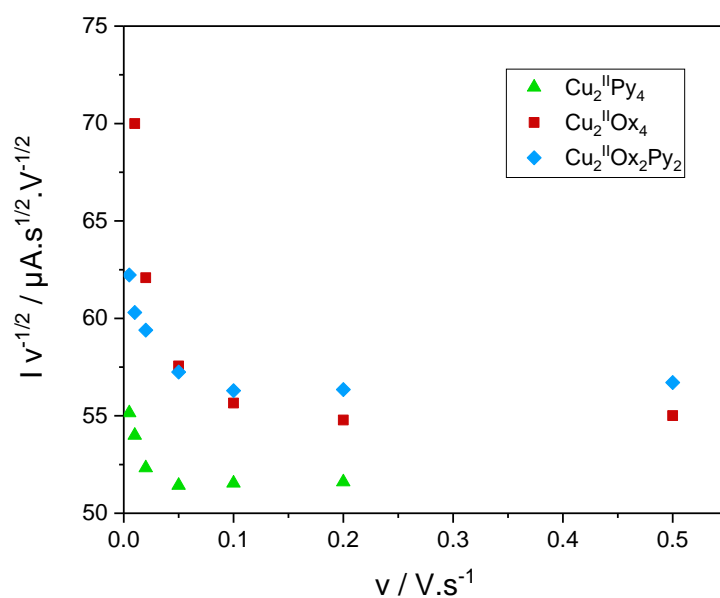

**Figure S9:** Plots of the normalized peak current  $I v^{-1/2}$  (where  $I$  is the peak current on the CV) against the scan rate  $v$  for complexes **1**, **2** and  $[(\text{Cu}_2(\text{Py}_4))(\mu\text{-OH})_2](\text{CF}_3\text{SO}_3)_2$  in concentration of 0.70 mM, 0.68 mM and 0.85 mM respectively in  $\text{CH}_3\text{CN}/\text{NBu}_4\text{ClO}_4$  0.1 M at 298 K. Working electrode : glassy carbon.

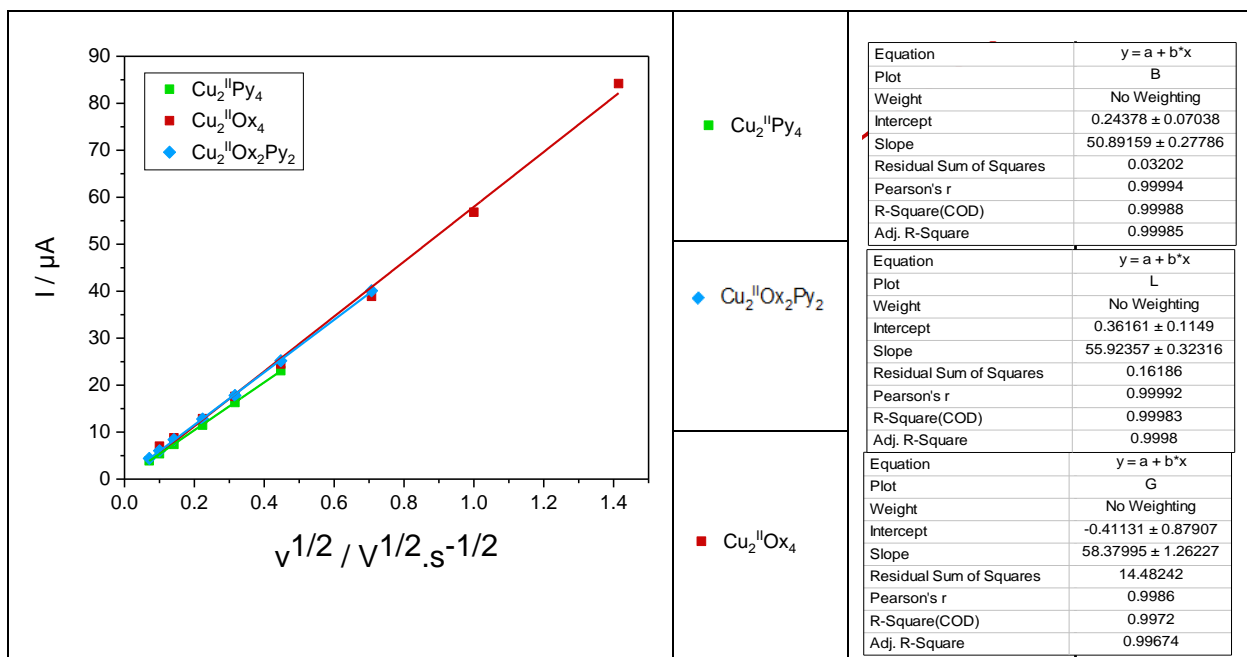

**Figure S10:** Plots of the  $I$  against  $v^{1/2}$  for complexes **1**, **2** and  $[(Cu_2(Py_4))(\mu-OH)_2](CF_3SO_3)_2$  for comparison

#### 4-4. EPR spectroscopy

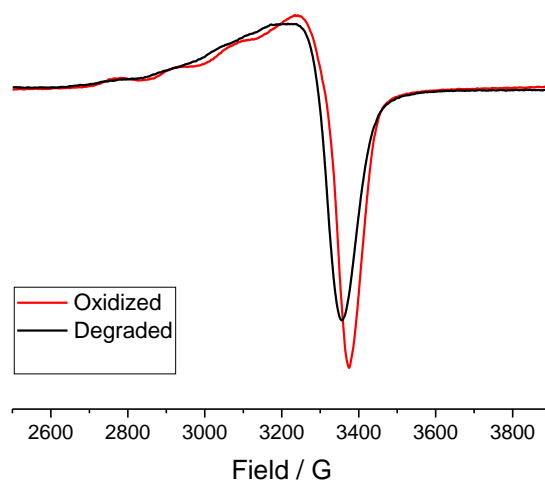

**Figure S11:** EPR spectrum of the mono-oxidized complex **1** after bulk electrolysis at  $-40^\circ\text{C}$ , and after heating to room temperature (black). Parameters: frozen solution of 0.7 mM of complex **1** in 0.1 M  $NBu_4ClO_4$  in acetonitrile;  $T = 15\text{ K}$ ; frequency = 9.419 GHz. Simulation was carried out with the EasySpin software© assuming the following parameter:  $g_{\perp} = 2.070$ ,  $g_{\parallel} = 2.291$ ,  $A_{\perp} = 18\text{ G}$ ,  $A_{\parallel} = 177\text{ G}$ .

## 4-5. UV-Vis-NIR spectroelectrochemistry

### Complex 1

(a)

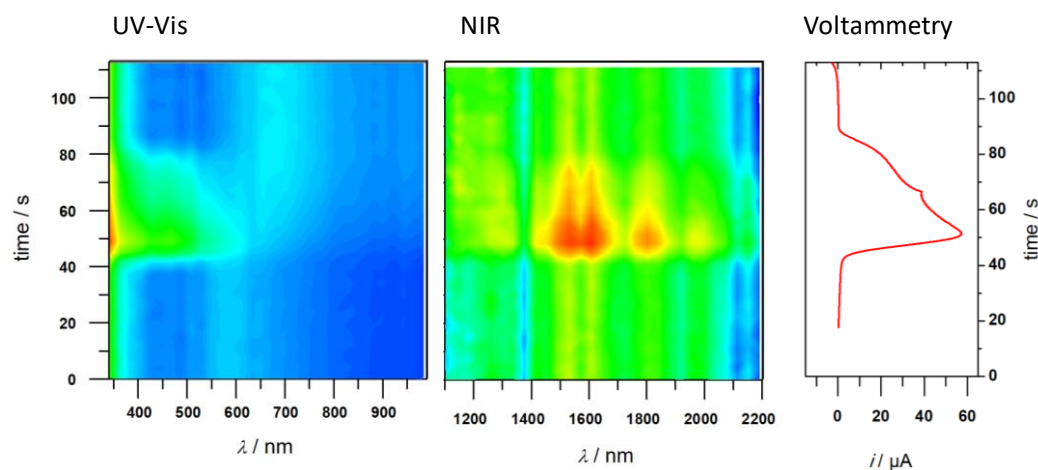

(b)

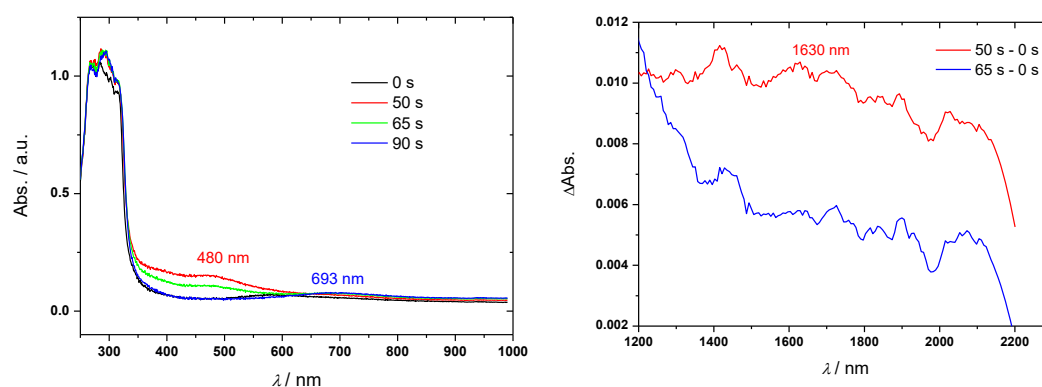

(c)

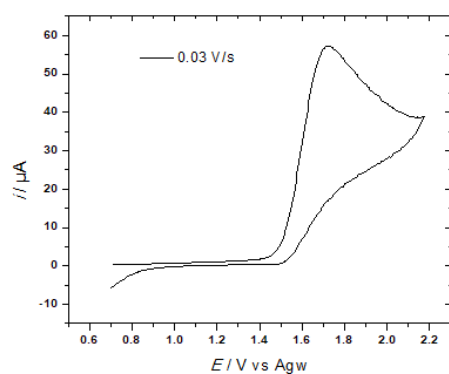

**Figure S12:** UV-Vis-NIR spectroelectrochemistry data in  $\text{CH}_3\text{CN}/\text{NBu}_4\text{ClO}_4$  0.1 M of compound **1** ( $C = 6.8$  mM, optical path 0.2 mm, baseline  $\text{CH}_3\text{CN}/\text{NBu}_4\text{ClO}_4$  0.1 M) at room temperature; (a) Time-monitoring of the oxidation process (right: current variation with time from CV shown in (c)); (b) Selected UV-Vis (left) and NIR (right) spectra from the spectroelectrochemical monitoring at different time intervals; (c) CV of the complex during the spectroelectrochemical measurement ( $v = 30$  mV/s).

Complex 2

(a)

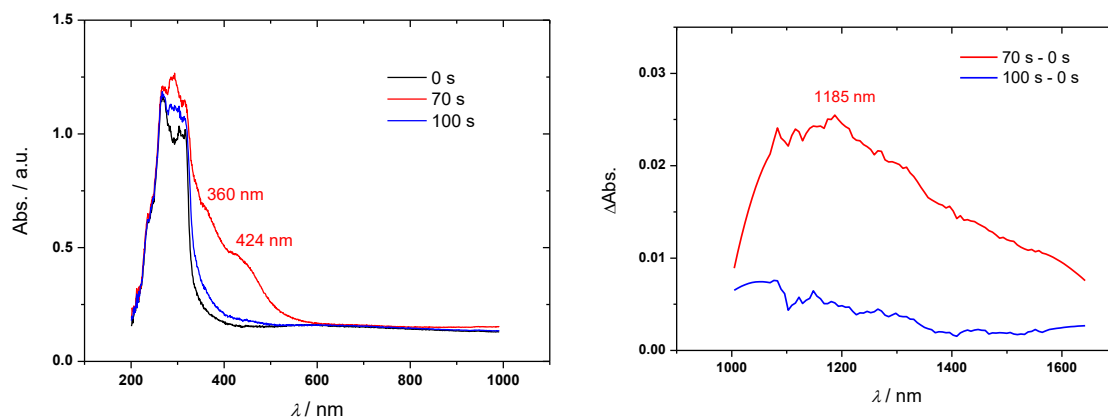

(b)

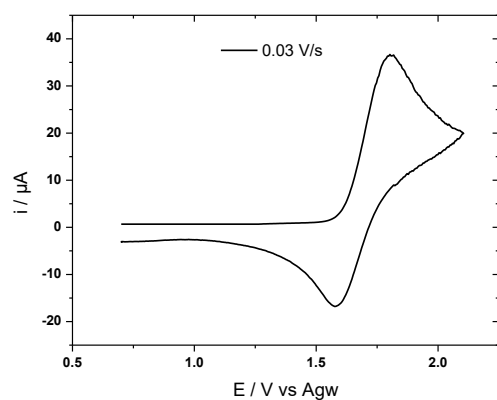

**Figure S13:** UV-Vis-NIR spectroelectrochemistry data in  $\text{CH}_3\text{CN}/\text{NBu}_4\text{ClO}_4$  0.1 M of compound **2** ( $C = 7.0$  mM, optical path 0.2 mm, baseline  $\text{CH}_3\text{CN}/\text{NBu}_4\text{ClO}_4$  0.1 M) at room temperature; (a) Selected UV-Vis (left) and NIR (right) spectra from the spectroelectrochemical monitoring at different time intervals (see Fig. 5); (b) CV of the complex during the spectroelectrochemical measurement ( $\nu = 30$  mV/s).

#### 4-6. Analysis of the NIR band for complex 2

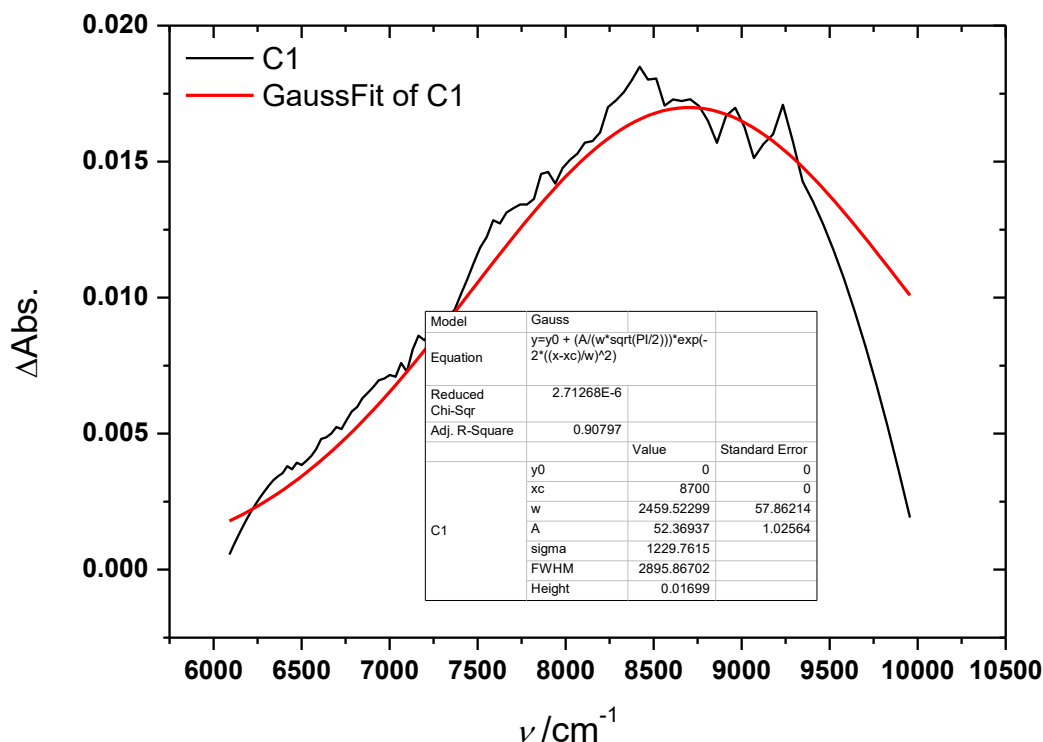

**Figure S14:** Experimental (black curve) and simulated (red curve, Gaussian shape) of the NIR band obtained by spectroelectrochemistry in  $\text{CH}_3\text{CN}/\text{NBu}_4\text{ClO}_4$  0.1 M of compound **2** ( $C = 7.0$  mM, optical path 0.2 mm, baseline  $\text{CH}_3\text{CN}/\text{NBu}_4\text{ClO}_4$  0.1 M) at room temperature.

The electronic coupling matrix element  $H_{AB}$  can be determined from the Mulliken-Hush expression: (references 40 and 41 of the main text)

$$H_{AB} = 0.0206 \left( \varepsilon_{\max} \tilde{\nu}_{\max} \Delta\tilde{\nu}_{1/2} \right)^{1/2} / R_{AB}$$

where  $\varepsilon_{\max}$  is the extinction coefficient at the band maximum ( $120 \text{ M}^{-1} \text{ cm}^{-1}$ ),  $\tilde{\nu}_{\max}$  the energy at the band maximum ( $8700 \text{ cm}^{-1}$ ),  $\Delta\tilde{\nu}_{1/2}$  the bandwidth at half-height ( $2460 \text{ cm}^{-1}$ ) and  $R_{AB}$  the effective charge transfer distance ( $2.80 \text{ \AA}$ ). The value found for  $H_{AB}$  is  $373 \text{ cm}^{-1}$ .

The parameter  $\Gamma$  relates to the ratio between the experimental and theoretical values of  $\Delta\tilde{\nu}_{1/2}$  :

$$\Gamma = 1 - \frac{(\Delta\tilde{\nu}_{1/2,\text{exp}})}{(\Delta\tilde{\nu}_{1/2,\text{theo}})}$$

For a class II system in the Robin-Day classification, (reference 38 of the main text)  $\Delta\tilde{\nu}_{1/2,\text{theo}}$  is given by:

$$\Delta\tilde{\nu}_{1/2,\text{theo}} = (2310 \tilde{\nu}_{\max})^{1/2}$$

Hence, for  $\tilde{\nu}_{\max} = 8700 \text{ cm}^{-1}$ ,  $\Delta\tilde{\nu}_{1/2,\text{theo}} = 4125 \text{ cm}^{-1}$  and  $\Gamma = 0.45$  (for class II:  $0.1 < \Gamma < 0.5$ )

## 5-Reactivity Studies of Cu<sup>II</sup> complexes

### 5-1.ESI-MS after electrolysis and demetallation

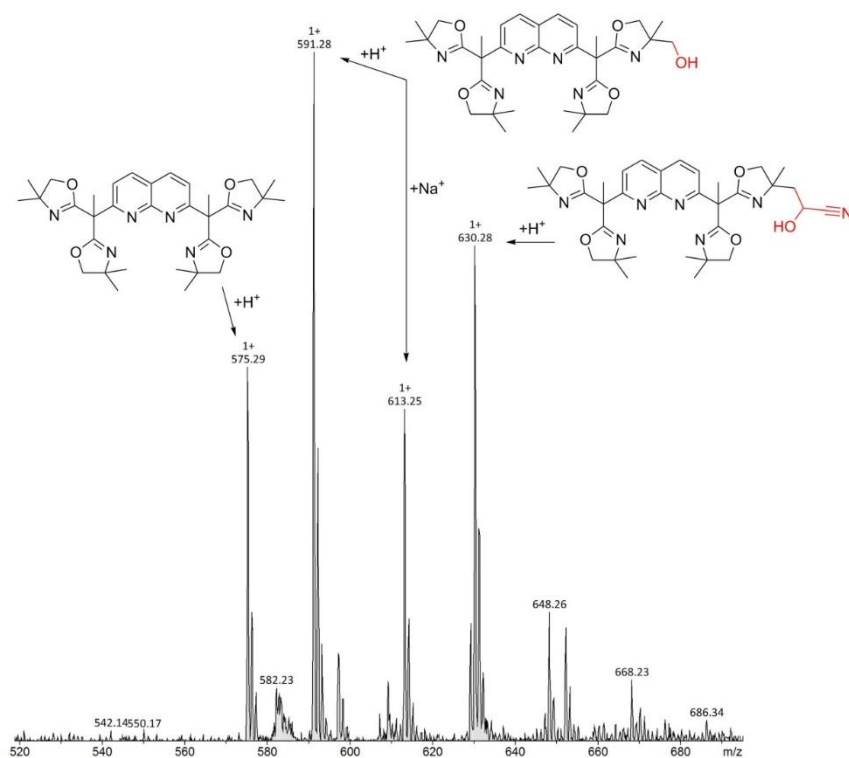

**Figure S15:** ESI-MS spectrum of the complex Cu<sup>II</sup><sub>2</sub>Ox<sub>4</sub> after electrolysis, demetallation and purification by column chromatography. The initial ligand and possible structures of the oxidized ligand are shown.

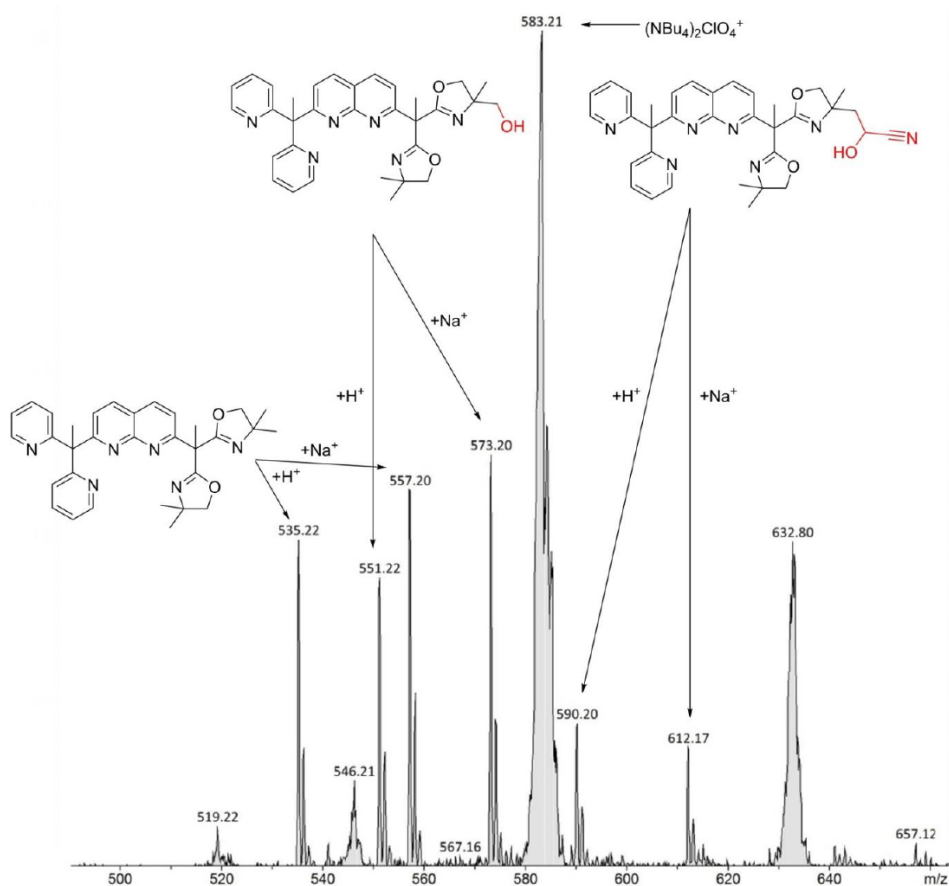

**Figure S16:** ESI-MS spectrum of the complex  $\text{Cu}^{\text{II}}_2\text{Ox}_2\text{Py}_2$  after electrolysis, demetallation and purification by column chromatography. The initial ligand and possible structures of the oxidized ligand are shown.

## 5-2. Proposed mechanisms

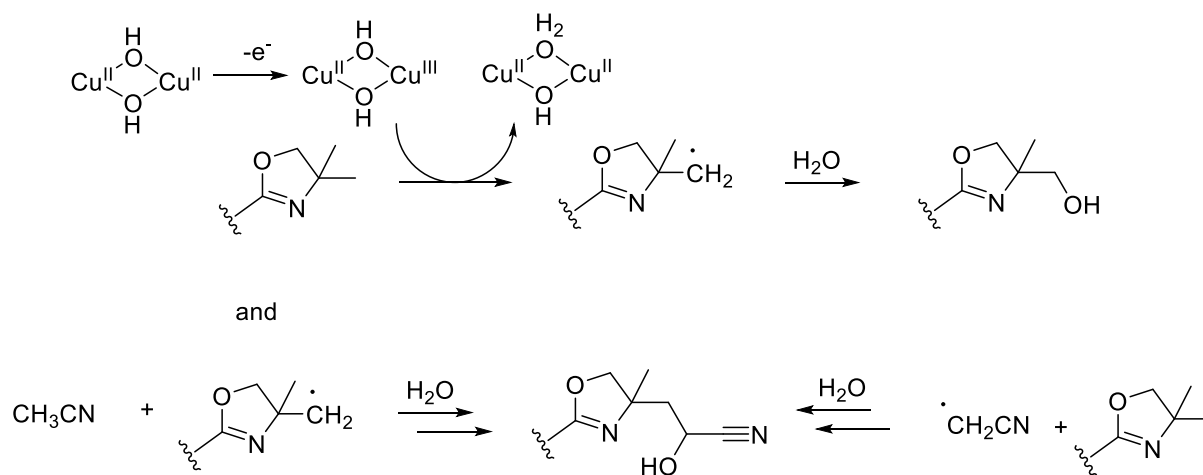

**Figure S17:** Possible mechanisms for the formation of LOH and LCHOHCN
